# Supplementary material for: Quantitative electrophysiological assessments as predictive markers of lower limb motor recovery after spinal cord injury: a pilot study with an adaptive trial design
Source: PubMed Central journal article supplement (PMC8873458; doi:10.1038/s41394-022-00491-0), 2022-02-24
Supplement: 41394_2022_491_MOESM1_ESM.pdf [file 41394_2022_491_MOESM1_ESM.pdf]

1 **Supplementary Table 1.** Compilation of participant's mean EPT values at the S2 dermatome over  
2 time for the right leg (A) and left leg (B).

3 A)

| <b>Right S2 dermatome</b> |           |         |
|---------------------------|-----------|---------|
|                           | Early IFR | Chronic |
| 001                       |           | 20      |
| 002                       | 3         | 5.6     |
| 003                       | 5         | 2       |
| 004                       | 12        | 12      |
| 005                       | absent    | absent  |
| Control average           | 3.6 ± 1.2 |         |

4

5 B)

| <b>Left S2 dermatome</b> |           |         |
|--------------------------|-----------|---------|
|                          | Early IFR | Chronic |
| 001                      | 30        | 20      |
| 002                      | 3.75      | 5.4     |
| 003                      | 7.2       | 1.9     |
| 004                      | 19        | 9.6     |
| 005                      | absent    | absent  |
| Control average          | 3.5 ± 2.0 |         |

6

7

8 Note: An absent EPT means that the participant did not feel anything in their lower limbs at stimulation  
9 intensities > 40 mA. Shaded areas indicate that EPT was not tested.

10 IFR, intensive functional rehabilitation; EPT, electrical perceptual threshold; S, sacral level

11 **Supplementary Table 2.** Characteristics of participants' H-reflex over time.

12 H/M ratio

| <b>Right H/M ratio</b> |           |         |
|------------------------|-----------|---------|
|                        | Early IFR | Chronic |
| 001SCI                 |           | 0.472   |
| 002SCI                 | 0.559     | 0.686   |
| 003SCI                 | 0.176     | 0.040   |
| 004SCI                 | 0.576     | 0.279   |
| 005SCI                 | absent    | absent  |
| Control average        | 0.4 ± 0.2 |         |

13

| <b>Left H/M ratio</b> |           |         |
|-----------------------|-----------|---------|
|                       | Early IFR | Chronic |
| 001SCI                | absent    | 0.351   |
| 002SCI                | 0.443     | 0.632   |
| 003SCI                | 0.061     | 0.062   |
| 004SCI                | 0.706     | 0.924   |
| 005SCI                | absent    | absent  |
| Control average       | 0.3 ± 0.2 |         |

14

15 H<sub>max</sub> latency

| <b>Right H<sub>max</sub> latency</b> |            |         |
|--------------------------------------|------------|---------|
|                                      | Early IFR  | Chronic |
| 001SCI                               |            | 35.5    |
| 002SCI                               | 34.0       | 32.0    |
| 003SCI                               | 35.5       | 42.0    |
| 004SCI                               | 36.5       | 32.9    |
| 005SCI                               | absent     | absent  |
| Control average                      | 33.3 ± 3.0 |         |

16

| <b>Left H<sub>max</sub> latency</b> |            |         |
|-------------------------------------|------------|---------|
|                                     | Early IFR  | Chronic |
| 001SCI                              | absent     | 31.5    |
| 002SCI                              | 33.5       | 31.0    |
| 003SCI                              | 38.0       | 40.5    |
| 004SCI                              | 36.5       | 36.0    |
| 005SCI                              | absent     | absent  |
| Control average                     | 34.0 ± 2.7 |         |

17 IFR, intensive functional rehabilitation; H<sub>max</sub>, maximal H wave; shaded areas = H-reflex was not tested;

**Supplementary Table 3.** Characteristics of participants' MEPs across time

|                        |                               | <b>Early IFR</b> |                 | <b>Chronic</b>      |                 |
|------------------------|-------------------------------|------------------|-----------------|---------------------|-----------------|
| <b>Participants</b>    | <b>Variables</b>              | <b>Right leg</b> | <b>Left leg</b> | <b>Right leg</b>    | <b>Left leg</b> |
| <b>002</b>             | MEP (yes/no)                  | yes              | yes             | yes                 | yes             |
|                        | Stim. Intensity (%)           | 100              | 100             | 90                  | 90              |
|                        | MEP-A (mV)                    | 0.292 ± 0.135    | 0.392 ± 0.066   | 0.915 ± 0.231       | 0.88 ± 0.203    |
|                        | MEP-A (%Mmax)                 | NA               | NA              | 30.1 ± 7.59         | 40.73 ± 9.4     |
|                        | MEP-L (ms)                    | 47.7 ± 7.6       | 32.6 ± 1.25     | 40.42 ± 5.29        | 35.03 ± 2.85    |
|                        | SP (yes/no)                   | yes              | yes             | yes                 | yes             |
|                        | SP-Latency (ms)               | 71,7             | 74              | 58,2                | 52,5            |
|                        | SP-Duration (ms)              | 150,9            | 208             | 72,51               | 54,48           |
| <b>003</b>             | Area ratio (%)                | 50.3             | 95.1            | 49.2                | 63              |
|                        | MEP (yes/no)                  | no               | no              | yes                 | yes             |
|                        | Stim. Intensity (%)           |                  |                 | 94                  | 94              |
|                        | MEP-A (mV)                    |                  |                 | 0.063 ± 0.03        | 0.073 ± 0.03    |
|                        | MEP-A (%Mmax)                 |                  |                 | NA                  | NA              |
|                        | MEP-L (ms)                    |                  |                 | 40.29 ± 2.45        | 50.501 ± 5.11   |
|                        | SP (yes/no)                   |                  |                 | no                  | no              |
|                        | SP-Latency (ms)               |                  |                 |                     |                 |
| <b>004</b>             | SP-Duration (ms)              |                  |                 |                     |                 |
|                        | Area ratio (%)                |                  |                 |                     |                 |
|                        | MEP (yes/no)                  | no               | no              | no                  | no              |
|                        | Stim. Intensity (%)           |                  |                 |                     |                 |
|                        | MEP-A (mV)                    |                  |                 |                     |                 |
|                        | MEP-A (%Mmax)                 |                  |                 |                     |                 |
|                        | MEP-L (ms)                    |                  |                 |                     |                 |
|                        | <b>MEP during contraction</b> |                  |                 | <b>MEP at rest</b>  |                 |
| <b>Control average</b> | MEP (yes/no)                  | yes              |                 | MEP (yes/no)        |                 |
|                        | Stim. Intensity (%)           | 48 ± 4           |                 | Stim. Intensity (%) |                 |
|                        | MEP-A (mV)                    | 0.36 ± 0.10      |                 | MEP-A (mV)          |                 |
|                        | MEP-A (%Mmax)                 | 14.7 ± 3.0       |                 | MEP-A (%Mmax)       |                 |
|                        | MEP-L (ms)                    | 33.4 ± 0.9       |                 | MEP-L (ms)          |                 |
|                        | SP (yes/no)                   | yes              |                 | SP (yes/no)         |                 |
|                        | SP-Latency (ms)               | 53.7 ± 2.4       |                 | SP-Latency (ms)     |                 |
|                        | SP-Duration (ms)              | 62.8 ± 14.9      |                 | SP-Duration (ms)    |                 |
| Area ratio (%)         | 55.1 ± 7.9                    |                  | Area ratio (%)  |                     |                 |
|                        |                               |                  |                 | No clear SP         |                 |

MEP: motor evoked potential; MEP-A: Amplitude of MEP; MEP-L: Latency of MEP

SP: silent period; IFR, intensive functional rehabilitation

NA: the Mmax was not assessed, so the normalized MEP was not evaluated

**Supplementary Table 4.** MSCC value and combined LEMS

|        | MSCC   | LEMS<br>(R+L) |
|--------|--------|---------------|
| 001SCI | 3,89   | 0             |
| 002SCI | 49,46  | 50            |
| 003SCI | 20,50  | 18            |
| 004SCI | 31,70  | 0             |
| 005SCI | 100,00 | 0             |
